# Supplementary material for: Age-Specific ADME Gene Expression in Infant Intestinal Enteroids
Source: PubMed Central journal article supplement (PMC11372835; doi:10.1021/acs.molpharmaceut.4c00302), 2024-08-09
Supplement: mp4c00302_si_001.pdf [file mp4c00302_si_001.pdf]

## Supplementary

### Age specific ADME gene expression in infant intestinal enteroids

Eva J. Streekstra<sup>1,2</sup>, Tom Scheer-Weijers<sup>1</sup>, Michael Bscheider<sup>3</sup>, Sabine Fuerst-Recktenwald<sup>3</sup>, Adrian B. Roth<sup>3</sup>, Sven C.D. van Ijzendoorn<sup>4</sup>, Sanne M.B.I. Botden<sup>5</sup>, Willem de Boode<sup>6</sup>, Martijn Stommel<sup>7</sup>, Rick Greupink<sup>1</sup>, Frans G. M. Russel<sup>1</sup>, Evita van de Steeg<sup>2</sup>, Saskia N. de Wildt<sup>1,8,9,\*</sup>

<sup>1</sup> Department of Pharmacy, Division of Pharmacology and Toxicology, Radboud University Medical Center, Nijmegen, The Netherlands

<sup>2</sup> Department of Metabolic Health Research, Netherlands Organization for Applied Scientific Research (TNO), Leiden, The Netherlands

<sup>3</sup> F. Hoffmann-La Roche Ltd, Basel, Switzerland

<sup>4</sup> Department of Biomedical Sciences, University of Groningen, University Medical Center Groningen, Groningen, The Netherlands

<sup>5</sup> Department of Pediatric Surgery, Radboud University Medical Center, Amalia Children's Hospital, Nijmegen, The Netherlands

<sup>6</sup> Department of Pediatrics, Division of Neonatology, Radboud University Medical Center, Amalia Children's Hospital, Nijmegen, The Netherlands

<sup>7</sup> Department of Surgery, Radboud University Medical Center, Nijmegen, The Netherlands

<sup>8</sup> Department of Intensive Care, Radboud University Medical Center, Nijmegen, the Netherlands

<sup>9</sup> Department of Neonatal and Pediatric Intensive Care, Erasmus MC Sophia Children's Hospital, Rotterdam, the Netherlands

\*Corresponding author: Saskia N. de Wildt; [Saskia.dewildt@radboudumc.nl](mailto:Saskia.dewildt@radboudumc.nl). P.O. Box 9101, 6500 HB Nijmegen (Route 137), the Netherlands. Phone number: +31(24)3093477

Supplementary Table 1: composition of solutions used in enteroid isolation and culturing.

| Solution                        | Components                                           | End concentration | Supplier                                      |
|---------------------------------|------------------------------------------------------|-------------------|-----------------------------------------------|
| Storage Buffer                  | Williams' E                                          |                   | Gibco, Thermo Fisher Scientific, Walthman, MA |
|                                 | Glucose                                              | 2.8 mg/mL         | Sigma-Aldrich, Burlington, MA                 |
|                                 | Amphotericin B                                       | 2.5 µg/mL         | Gibco, Thermo Fisher Scientific, Walthman, MA |
|                                 | Gentamicin                                           | 500 µg/mL         | Gibco, Thermo Fisher Scientific, Walthman, MA |
|                                 | GlutaMAX                                             | 2mM               | Gibco, Thermo Fisher Scientific, Walthman, MA |
|                                 | HEPES                                                | 10mM              | Gibco, Thermo Fisher Scientific, Walthman, MA |
| Wash Buffer                     | PBS                                                  |                   | Gibco, Thermo Fisher Scientific, Walthman, MA |
|                                 | Pen/Strep                                            | 100 U/mL          | Gibco, Thermo Fisher Scientific, Walthman, MA |
|                                 | Gentamicin                                           | 500 µg/mL         | Gibco, Thermo Fisher Scientific, Walthman, MA |
|                                 | Amphotericin B                                       | 2,5 µg/mL         | Gibco, Thermo Fisher Scientific, Walthman, MA |
|                                 | Primocin                                             | 50 µg/mL          | Invitrogen, Carlsbad, CA                      |
| Crypt releasing solution        | Wash buffer                                          |                   | See above                                     |
|                                 | EDTA                                                 | 4 mM              | Sigma-Aldrich, Burlington, MA                 |
|                                 | DTT                                                  | 2 mM              | Roche, Basel, Switzerland                     |
| Advance DMEM +++                | Advanced DMEM                                        |                   | Gibco, Thermo Fisher Scientific, Walthman, MA |
|                                 | Pen/strep                                            | 100 U/mL          | Gibco, Thermo Fisher Scientific, Walthman, MA |
|                                 | GlutaMAX 100x                                        | 2 mM              | Gibco, Thermo Fisher Scientific, Walthman, MA |
|                                 | HEPES                                                | 10 mM             | Gibco, Thermo Fisher Scientific, Walthman, MA |
| Organoid Growth Medium          | IntestiCult™ Organoid Growth Medium (Human)          |                   | STEMCELL™ Technologies, Vancouver, BC, Canada |
|                                 | IntestiCult™ Organoid Supplement                     |                   | STEMCELL™ Technologies, Vancouver, BC, Canada |
|                                 | Pen/Strep                                            | 100 U/mL          | Gibco, Thermo Fisher Scientific, Walthman, MA |
|                                 | Rock-inhibitor (Y-27632)*                            | 10 µM             | STEMCELL™ Technologies, Vancouver, BC, Canada |
| Organoid Differentiation Medium | IntestiCult™ Organoid Differentiation Medium (Human) |                   | STEMCELL™ Technologies, Vancouver, BC, Canada |
|                                 | IntestiCult™ Organoid Supplement                     |                   | STEMCELL™ Technologies, Vancouver, BC, Canada |
|                                 | Pen/Strep                                            | 100 U/mL          | Gibco, Thermo Fisher Scientific, Walthman, MA |
|                                 | DAPT                                                 | 5 µM              | STEMCELL™ Technologies, Vancouver, BC, Canada |

\*Only added during the first 3 days after enteroid isolation.

Supplementary Table 2: statistical values of Figure 2, Wilcoxon matched-paired signed rank test. IQR: interquartile range.

|         | Median ± IQR<br>early passage | Median ± IQR<br>late passage | p-value paired donors<br>early vs late passage |
|---------|-------------------------------|------------------------------|------------------------------------------------|
| P-gp    | 0.47 ± 1.36                   | 0.26 ± 0.46                  | 0.3594                                         |
| BCRP    | 0.37 ± 0.549                  | 0.27 ± 0.44                  | 0.0547                                         |
| PEPT1   | 0.028 ± 0.02                  | 0.03 ± 0.03                  | 0.6523                                         |
| MRP2    | 0.04 ± 0.25                   | 0.05 ± 0.12                  | 0.2500                                         |
| CYP3A4  | 0.31 ± 0.34                   | 0.21 ± 0.23                  | 0.4258                                         |
| UGT1A1  | 0.99 ± 1.71                   | 0.69 ± 1.32                  | 0.9102                                         |
| CYP2C18 | 0.02 ± 0.02                   | 0.02 ± 0.05                  | 0.2500                                         |
| VIL-1   | 0.0006 ± 0.0008               | 0.0004 ± 0.0003              | 0.2500                                         |

Supplementary Table 3: statistical values of Figure 3, Wilcoxon matched-paired signed rank test. IQR: interquartile range.

|         | Median ± IQR<br>tissue | Median ± IQR<br>enteroid | p-value paired donors<br>tissue vs enteroid |
|---------|------------------------|--------------------------|---------------------------------------------|
| P-gp    | 0.36 ± 0.74            | 0.27 ± 0.72              | >0.9999                                     |
| BCRP    | 0.39 ± 0.36            | 0.27 ± 0.39              | 0.7695                                      |
| PEPT1   | 0.42 ± 0.25            | 0.03 ± 0.03              | 0.0020                                      |
| MRP2    | 0.10 ± 0.12            | 0.04 ± 0.13              | 0.1934                                      |
| CYP3A4  | 0.34 ± 0.99            | 0.27 ± 0.16              | 0.2754                                      |
| UGT1A1  | 0.07 ± 0.16            | 0.54 ± 1.10              | 0.0039                                      |
| CYP2C18 | 0.44 ± 0.32            | 0.024 ± 0.03             | 0.0020                                      |
| VIL-1   | 0.0002 ± 0.00012       | 0.0005 ± 0.0005          | 0.0039                                      |

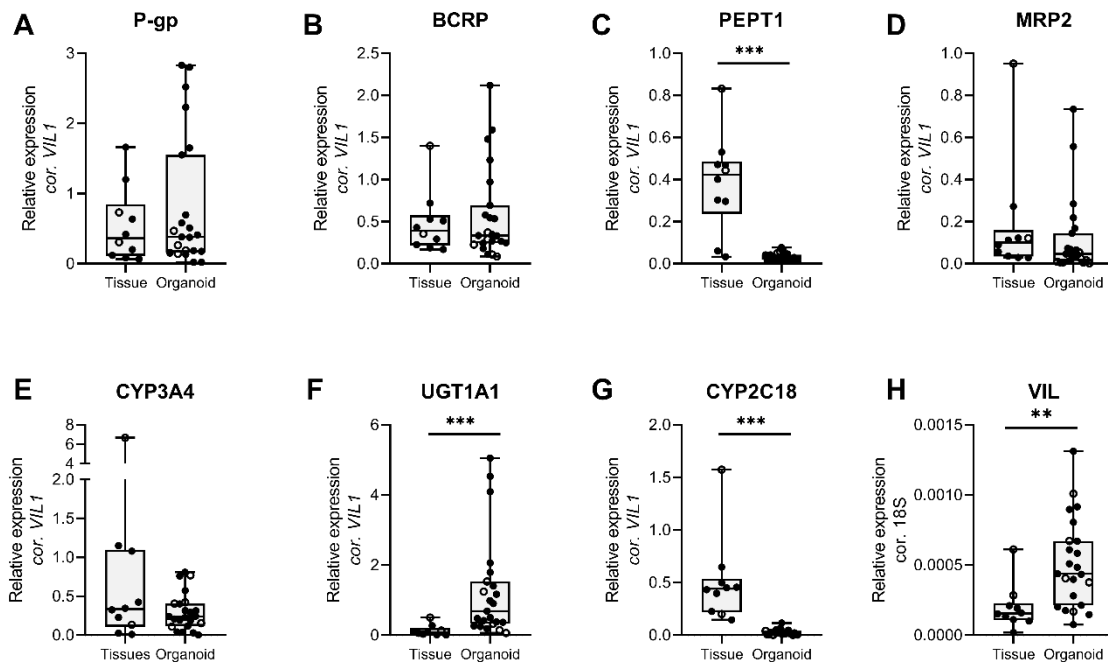

Supplementary Figure 1: relative gene expression in all tissues and enteroid samples corrected for Villin-1 (VIL1), Villin-1 corrected for 18S. Shown in Median ± Min. to Max. Shows similar expression in tissue and enteroids for P-gp, BCRP, MRP2, CYP3A4. PEPT1, UGT1A1, CYP2C18 and VIL1 show deviating expressions between tissue and enteroids. Individual dots represent individual donors for tissue and individual passages of all donors for enteroids. Open circles indicate adult donors, closed circles pediatric donors. A: P-gp (ABCB1), B: BCRP (ABCG2), C: PEPT1 (SLC15A1), D: MRP2 (ABCC2), E: CYP3A4, F: UGT1A1, G: CYP2C18, H: Villin-1. \*\*: p < 0.01, \*\*\*: p < 0.001, exact p-values are presented in Supplementary table 4.

Supplementary Table 4: statistical p-values of Supplementary Figure 1, Mann-Whitney test

| <b>Early vs late passage</b> |         |
|------------------------------|---------|
| <b>P-gp</b>                  | 0.7727  |
| <b>BCRP</b>                  | >0.9999 |
| <b>PEPT1</b>                 | <0.0001 |
| <b>MRP2</b>                  | 0.1928  |
| <b>CYP3A4</b>                | 0.3633  |
| <b>UGT1A1</b>                | 0.0001  |
| <b>CYP2C18</b>               | <0.0001 |
| <b>VIL-1</b>                 | 0.0021  |
